# Supplementary material for: Kidney stones consisting of 1-methyluric acid
Source: publisher site journal article supplement (doi:10.1515/cclm-2025-0627), 2025-05-23
Supplement: Supplementary file 1 [file j_cclm-2025-0627_suppl_001.docx]

**Legends Supplementary Material**

**Supplementary Figure 1**

IR spectra of kidney stones from all 7 patients described in the paper. The patients in F igure (A – E) and (G) have stones predominantly containing 1-methyluric acid and a small amount of uric acid, whereas the patient in (F) has a stone mainly containing Whewellit (Calcium Oxalate, monohydrate) with a small admixture of 1-methyluric acid (20 – 30 %) and Calcium Apatite (10 %).

**Supplementary Table 1. Biochemical information and daily intake of coffee / tea.**

|  | **Sex** | **P-Creatinine*** | **P-Urate**** | **U-pH** | **Intake of**  **coffee / tea** |
| --- | --- | --- | --- | --- | --- |
| **Case** |  | µmol/L | mmol/L |  | Cups |
| **1** | M | 148 – 170 | 0.37 | 6.0 |  |
| **2** | M | 192 | 0.57 | 6.0 | 8 |
| **3** | F | 149 |  |  |  |
| **4** | F | 120 | 0.48 | 5.5 | 3-4 |
| **5** | M | 84 | 0.47 | 5.5 |  |
| **6** | M | 160-200 | 0.49 – 0.51 | 5.5 | 4-5 / 1 |
| **7** | F | 197 | 0.72 | 6.0 | 6-8 |

* Reference interval: Females 45-90 µmol/L; Males 60 – 105 µmol/L

** Reference interval: Females 0.16 – 0.40 mmol/L; Males 0.23 – 0.48 mmol/L
